# Supplementary material
Source: publisher figshare collection journal article supplement (https://plos.figshare.com/articles/dataset/_/6183791)
Supplement: Supplementary file [file 1]

**S3 Table.** Average and standard deviation of RMSD, ASA and  $\Delta$ ASA with domains C1 and C2 for ATP bound to AC5 in the absence or in the presence of Gs $\alpha$  and in the presence of FOK.

| <b>Data</b>                                       | <b>AC5+ATP</b> | <b>AC5+ATP+Gs<math>\alpha</math></b> | <b>AC5+ATP+FOK</b> |
|---------------------------------------------------|----------------|--------------------------------------|--------------------|
| RMSD ATP ( $\text{\AA}$ )                         | $0.6 \pm 0.0$  | $0.3 \pm 0.1$                        | $0.2 \pm 0.1$      |
| ASA <sub>ATP</sub> ( $\text{\AA}^2$ )             | $94 \pm 20$    | $71 \pm 14$                          | $85 \pm 12$        |
| $\Delta$ ASA <sub>ATP-C1</sub> ( $\text{\AA}^2$ ) | $263 \pm 15$   | $244 \pm 13$                         | $247 \pm 11$       |
| $\Delta$ ASA <sub>ATP-C2</sub> ( $\text{\AA}^2$ ) | $259 \pm 17$   | $301 \pm 19$                         | $284 \pm 10$       |
