# Supplementary material
Source: publisher figshare collection journal article supplement (https://plos.figshare.com/articles/dataset/_/6183791)
Supplement: Supplementary file [file 1]

**S2 Table.** Average and standard deviation of RMSD for the C1 and C2 domains of AC5,  $\alpha$ -helix angles for both domains and characterization of the C1/C2 interface: gap volume, change in accessible surface area ( $\Delta$ ASA) and gap index, for the systems studied with molecular dynamics simulation. To compute the RMSD we used the average structure as the reference state.

| <b>Data</b>                    | <b>AC5+FOK</b> | <b>AC5+ATP+FOK</b> |
|--------------------------------|----------------|--------------------|
| RMSD C1 (Å)                    | $0.8 \pm 0.1$  | $0.8 \pm 0.1$      |
| RMSD C2 (Å)                    | $0.8 \pm 0.1$  | $0.9 \pm 0.2$      |
| $\alpha_{C1}$ (°)              | $23 \pm 4$     | $44 \pm 5$         |
| $\alpha_{C2}$ (°)              | $46 \pm 4$     | $40 \pm 3$         |
| Gap Volume (Å <sup>3</sup> )   | $7500 \pm 464$ | $6256 \pm 385$     |
| $\Delta$ ASA (Å <sup>2</sup> ) | $2354 \pm 88$  | $2308 \pm 77$      |
| Gap index (Å)                  | $3.2 \pm 0.2$  | $2.7 \pm 0.2$      |
