# Supplementary material
Source: publisher figshare collection journal article supplement (https://plos.figshare.com/articles/dataset/_/6183791)
Supplement: Supplementary file [file 1]

**S4 Table.** Average and standard deviation of the gap volume,  $\Delta$ ASA and the gap index of the AC5/Gs $\alpha$  interface in presence and in the absence of ATP.

| <b>Data</b>                     | <b>AC5+ATP+Gs<math>\alpha</math></b> | <b>AC5+Gs<math>\alpha</math></b> |
|---------------------------------|--------------------------------------|----------------------------------|
| Gap Volume ( $\text{\AA}^3$ )   | $3286 \pm 333$                       | $3424 \pm 361$                   |
| $\Delta$ ASA ( $\text{\AA}^2$ ) | $1244 \pm 123$                       | $1067 \pm 63$                    |
| Gap index ( $\text{\AA}$ )      | $2.7 \pm 0.5$                        | $3.2 \pm 0.4$                    |
