# Supplementary material
Source: publisher figshare collection journal article supplement (https://plos.figshare.com/articles/dataset/_/6183791)
Supplement: Supplementary file [file 1]

**S1 Table.** Average and standard deviation of RMSD for the C1 and C2 domains of AC5,  $\alpha$ -helix angles for both domains and characterization of the C1/C2 interface: gap volume, change in accessible surface area ( $\Delta$ ASA) and gap index, for the systems studied with molecular dynamics simulation. To compute the RMSD we used the average structure as the reference state.

| <b>Data</b>                    | <b>AC5</b>     | <b>AC5+ATP</b> | <b>AC5+ATP+Gsa</b> | <b>AC5+Gsa</b> |
|--------------------------------|----------------|----------------|--------------------|----------------|
| RMSD C1 (Å)                    | 1.0 $\pm$ 0.2  | 0.9 $\pm$ 0.2  | 0.8 $\pm$ 0.1      | 1.0 $\pm$ 0.2  |
| RMSD C2 (Å)                    | 1.2 $\pm$ 0.4  | 1.2 $\pm$ 0.2  | 1.1 $\pm$ 0.2      | 0.9 $\pm$ 0.2  |
| $\alpha_{C1}$ (°)              | 26 $\pm$ 4     | 44 $\pm$ 6     | 42 $\pm$ 5         | 31 $\pm$ 6     |
| $\alpha_{C2}$ (°)              | 50 $\pm$ 4     | 43 $\pm$ 5     | 47 $\pm$ 3         | 43 $\pm$ 4     |
| Gap Volume (Å <sup>3</sup> )   | 7021 $\pm$ 544 | 6183 $\pm$ 418 | 7319 $\pm$ 542     | 6872 $\pm$ 479 |
| $\Delta$ ASA (Å <sup>2</sup> ) | 2311 $\pm$ 161 | 2258 $\pm$ 96  | 1927 $\pm$ 143     | 2236 $\pm$ 91  |
| Gap index (Å)                  | 3.1 $\pm$ 0.3  | 2.8 $\pm$ 0.3  | 3.8 $\pm$ 0.5      | 3.1 $\pm$ 0.3  |
